# Supplementary material for: Increased Risk of Subsequent Myocardial Infarction in Patients With Type 2 Diabetes: A Retrospective Cohort Study Using the U.K. General Practice Research Database
Source: Oxford University Press journal article supplement (doi:10.2337/dc13-1953), 2014-03-05

SUPPLEMENTARY DATA

**Supplementary Table 1.** Patient characteristics at baseline stratified by BMI data missing status (N=56,137).

|                         | T2DM             |                  |         | Non-T2DM         |                  |         |
|-------------------------|------------------|------------------|---------|------------------|------------------|---------|
|                         | BMI              | No BMI           | P-value | BMI              | No BMI           | P-value |
| N                       | 5,708            | 1,703            |         | 16,273           | 32,453           |         |
| Mean age ± SD (median)  | 70.6 ± 10.8 (72) | 70.7 ± 12.0 (71) | 0.9211  | 68.3 ± 12.0 (69) | 68.5 ± 12.7 (69) | 0.1798  |
| Gender                  |                  |                  |         |                  |                  |         |
| Men                     | 3,669 (64.3%)    | 1,026 (60.3%)    | 0.0024  | 10,689 (65.7%)   | 21,136 (65.1%)   | 0.2227  |
| Smoking                 | 4,249 (74.4%)    | 889 (52.2%)      | <0.0001 | 11,871 (73.0%)   | 18,154 (55.9%)   | <0.0001 |
| Obesity                 | 2,376 (41.6%)    | 143 (8.4%)       | <0.0001 | 4,293 (26.4%)    | 851 (2.6%)       | <0.0001 |
| Dyslipidemia            | 1,360 (23.8%)    | 223 (13.1%)      | <0.0001 | 2,680 (16.5%)    | 3,105 (9.6%)     | <0.0001 |
| Hypertension            | 5,615 (98.4%)    | 1,592 (93.5%)    | <0.0001 | 15,140 (93.0%)   | 27,456 (84.6%)   | <0.0001 |
| Unstable Angina         | 356 (6.2%)       | 82 (4.8%)        | 0.029   | 700 (4.3%)       | 986 (3.0%)       | <0.0001 |
| History of MI           | 823 (14.4%)      | 212 (12.5%)      | 0.0396  | 2,146 (13.2%)    | 2,799 (8.6%)     | <0.0001 |
| Family history of MI    | 142 (2.5%)       | 25 (1.5%)        | 0.0128  | 542 (3.3%)       | 549 (1.7%)       | <0.0001 |
| Statin use              | 3,331 (58.4%)    | 553 (32.5%)      | <0.0001 | 5,829 (35.8%)    | 6,083 (18.7%)    | <0.0001 |
| BMI status              |                  |                  |         |                  |                  |         |
| Underweight             | 39 (0.7%)        | NA               | NA      | 357 (2.2%)       | NA               | NA      |
| Normal weight           | 1,097(19.2%)     |                  |         | 5,073 (31.2%)    |                  |         |
| Overweight              | 2,383 (41.8%)    |                  |         | 6,743 (41.4%)    |                  |         |
| Class I obesity         | 1,472 (25.8%)    |                  |         | 3,045 (18.7%)    |                  |         |
| Class II and up obesity | 717 (12.6%)      |                  |         | 1,055 (6.5%)     |                  |         |

SUPPLEMENTARY DATA

**Supplementary Table 2.** Adjusted hazard ratios stratified by gender for outcomes of cardiovascular (CV) death and non-cardiovascular death for T2DM versus non-T2DM patients eligible for ONS linkage in the primary cohort

|                                                                 | Events | Adj HR* [95% CI]  | Covariates adjustment <sup>†</sup> (HR)                                                               |
|-----------------------------------------------------------------|--------|-------------------|-------------------------------------------------------------------------------------------------------|
| A subset analysis of the primary cohort <sup>‡</sup> (n=31,313) |        |                   |                                                                                                       |
| CV death                                                        |        |                   |                                                                                                       |
| Men                                                             | 2,958  | 1.49 [1.36, 1.64] | Age (1.09), unstable angina (1.16), hypertension (1.46), personal history of MI (1.85)                |
| Women                                                           | 1,972  | 1.46 [1.30, 1.65] | Age (1.09), unstable angina (1.34), hypertension (1.39), personal history of MI (1.59), statin (1.14) |
| non-CV death                                                    |        |                   |                                                                                                       |
| Men                                                             | 2,635  | 1.44 [1.30, 1.59] | Age (1.09), smoking (1.29), dyslipidemia (0.81)                                                       |
| Women                                                           | 1,806  | 1.38 [1.22, 1.57] | Age (1.08), smoking (1.30), dyslipidemia (0.82), family history of MI (0.65), unstable angina (1.33)  |

\* All p-values for these adjusted HRs were <0.0001.

<sup>†</sup> Covariates (binary variables unless specified) used to fit the stepwise proportional hazards models consisted of age (continuous), unstable angina, dyslipidemia, hypertension, use of statins, smoking, personal history of MI, family history of MI, and obesity.

<sup>‡</sup>The primary cohort was identified with specific and non-specific Read codes for MI. Patients for this subset were those who were eligible to be linked to the ONS mortality linkage data.

SUPPLEMENTARY DATA

**Supplementary Table 3.** Sensitivity analysis (requiring 28 days instead of 90 days of registration with a general practice) of adjusted hazard ratios stratified by gender for recurrent MI, all-cause death, and a composite outcome of all-cause death or recurrent MI for T2DM versus non-T2DM patients in primary cohort

|                                               | Events <sup>*</sup> | Adj HR <sup>†</sup> [95% CI] | Covariates adjustment <sup>‡</sup> (HR)                                                                                                                     |
|-----------------------------------------------|---------------------|------------------------------|-------------------------------------------------------------------------------------------------------------------------------------------------------------|
| Primary cohort <sup>§</sup><br>(n=58,282)     |                     |                              |                                                                                                                                                             |
| Recurrent MI <sup>  </sup>                    |                     |                              |                                                                                                                                                             |
| Men                                           | 6,434               | 1.15 [1.07, 1.23]            | Age (1.01), unstable angina (1.30), hypertension (0.88), personal history of MI (1.24)                                                                      |
| Women                                         | 3,416               | 1.25 [1.14, 1.37]            | Age (1.01), unstable angina (1.20), dyslipidemia (1.17), personal history of MI (1.13)                                                                      |
| All-cause death <sup>  </sup>                 |                     |                              |                                                                                                                                                             |
| Men                                           | 11,866              | 1.38 [1.32, 1.45]            | Age (1.09), unstable angina (1.12), smoking (1.16), dyslipidemia (0.90), hypertension (1.24), personal history of MI (1.36), statins (1.09)                 |
| Women                                         | 8,325               | 1.46 [1.38, 1.55]            | Age (1.08), smoking (1.19), obesity (0.91), hypertension (1.18), unstable angina (1.29), dyslipidemia (0.86), personal history of MI (1.29), statins (1.11) |
| All-cause death or recurrent MI <sup>  </sup> |                     |                              |                                                                                                                                                             |
| Men                                           | 15,665              | 1.27 [1.21, 1.32]            | Age (1.05), unstable angina (1.12), smoking (1.11), personal history of MI (1.28), dyslipidemia (0.95)                                                      |
| Women                                         | 9,973               | 1.35 [1.28, 1.43]            | Age (1.06), unstable angina (1.25), smoking (1.14), obesity (0.94), personal history of MI (1.25)                                                           |

\* A minimum of 28 days instead of 90 days of registration with a GP was required in this sensitivity analysis. Therefore, all outcomes started from 28 days after index MI.

† All p-values for these adjusted HRs were <0.0001.

‡ Covariates (binary variables unless specified) used to fit the stepwise proportional hazards models consisted of age (continuous), unstable angina, dyslipidemia, hypertension, use of statins, smoking, personal history of MI, family history of MI, and obesity.

§ The primary cohort was identified with specific and non-specific Read codes for MI.

|| The primary outcome was recurrent MI, the secondary outcomes were all-cause death and a composite of all-cause death or recurrent MI.

SUPPLEMENTARY DATA

**Supplementary Figure 1.** Graphical assessment of proportional hazards assumption for primary outcome (n=56,137) Notes: solid circles = Non-T2DM, hollow circles = T2DM.

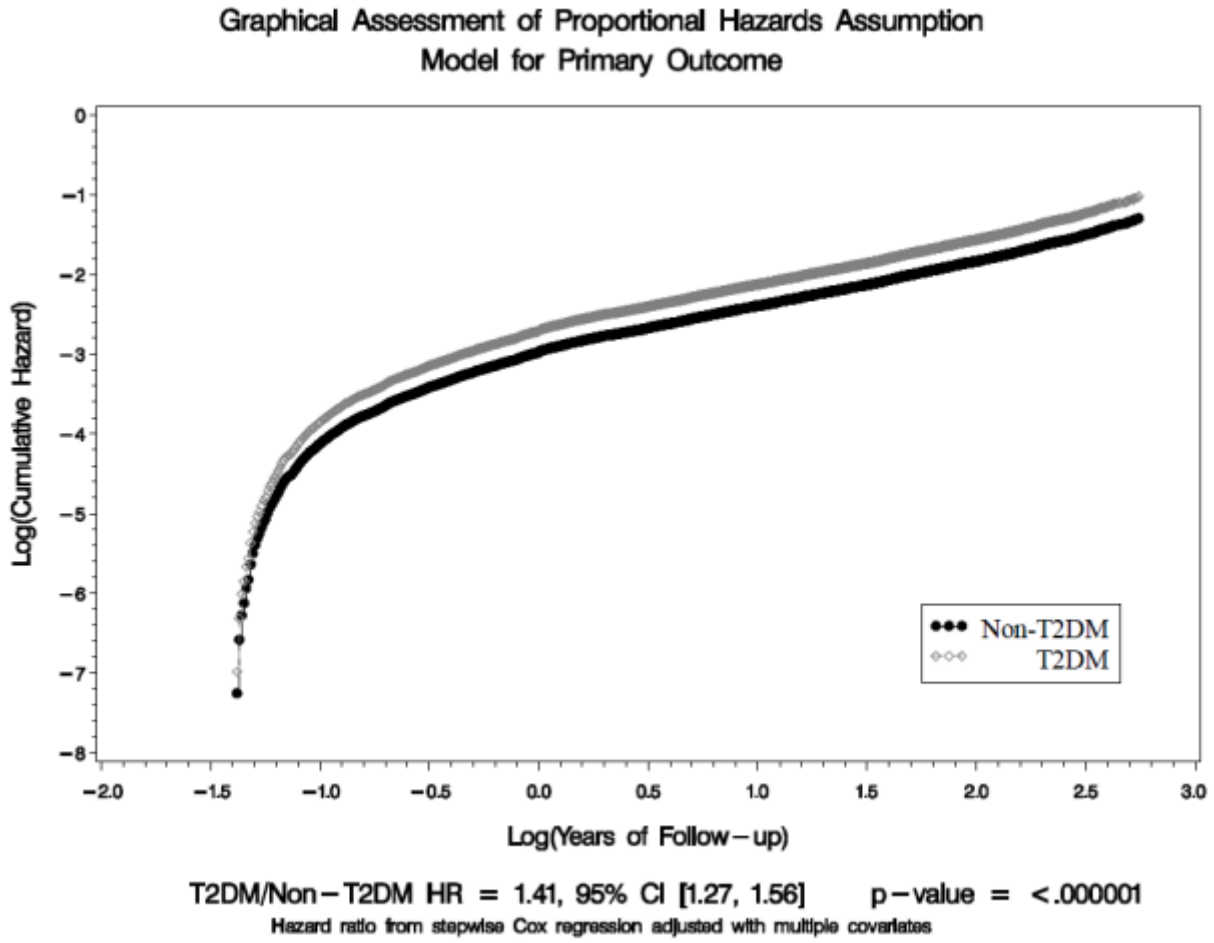

SUPPLEMENTARY DATA

**Supplementary Figure 2.** Graphical assessment of proportional hazards assumption for the composite endpoint of all-cause death or subsequent myocardial infarction (n=56,137) Notes: solid circles = Non-T2DM, hollow circles = T2DM.

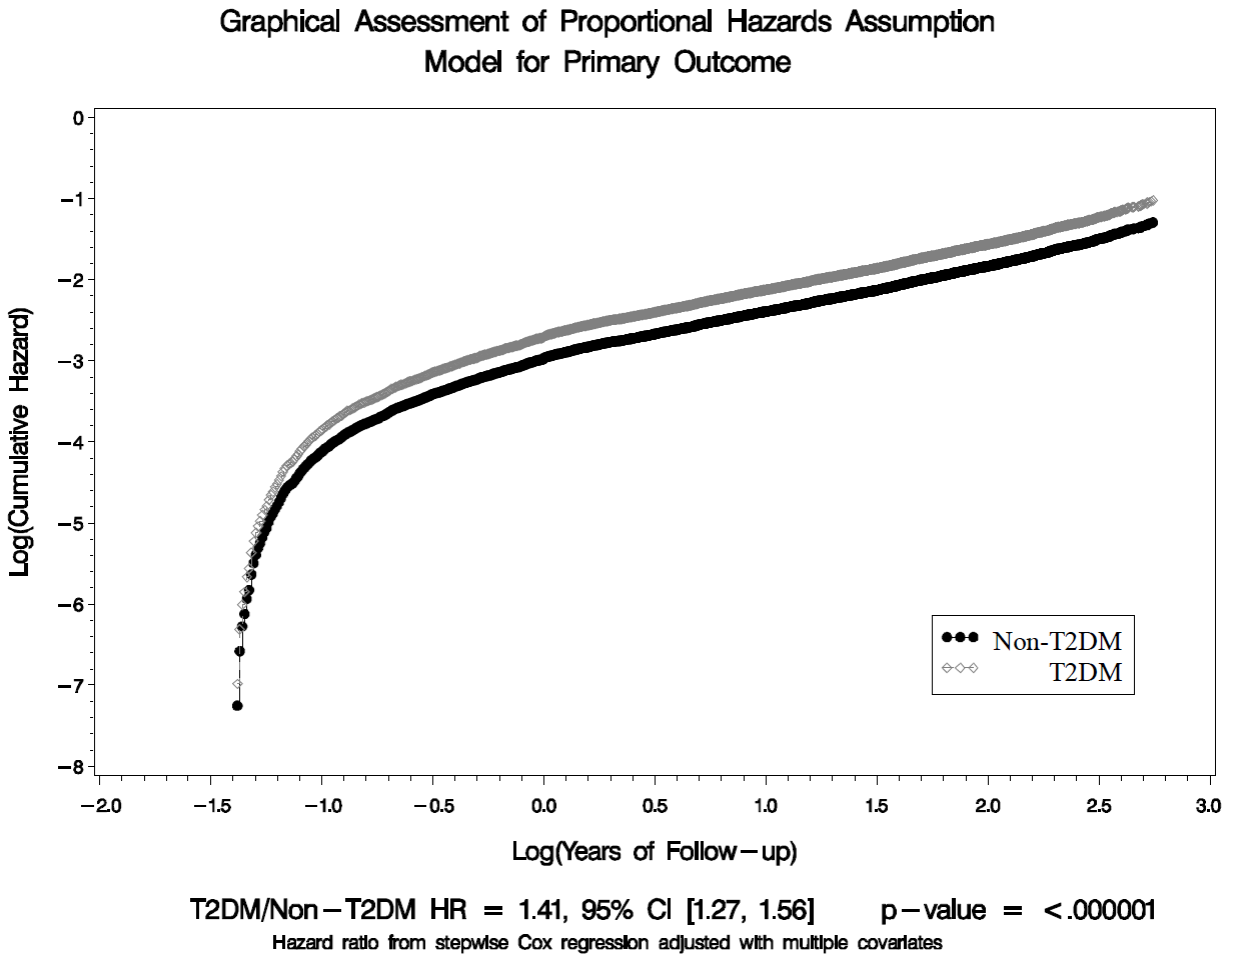

Supplement: dc131953supplementarydata.pdf [file dc131953supplementarydata.pdf]
